- Intramyocardial, autologous CD34+ cell therapy for refractory angina. *Circ Res* 2011;**109**:428–436.
7. Povsic TJ, Junge C, Nada A, Schatz RA, Harrington RA, Davidson CJ, Fortuin FD, Kereiakes DJ, Mendelsohn FO, Sherman W, Schaer GL, White CJ, Stewart D, Story K, Losordo DW, Henry TD. A phase 3, randomized, double-blinded, active-controlled, unblinded standard of care study assessing the efficacy and safety of intramyocardial autologous CD34+ cell administration in patients with refractory angina: design of the RENEW study. *Am Heart J* 2013;**165**:854–861.
  8. Vrtovec B, Poglajen G, Lezaic L, Sever M, Domanovic D, Cernelc P, Socan A, Schrepfer S, Torre-Amione G, Haddad F, Wu JC. Effects of intracoronary CD34+ stem cell transplantation in nonischemic dilated cardiomyopathy patients: 5-year follow-up. *Circ Res* 2013;**112**:165–173.
  9. Vrtovec B, Poglajen G, Lezaic L, Sever M, Socan A, Domanovic D, Cernelc P, Torre-Amione G, Haddad F, Wu JC. Comparison of transcatheter and intracoronary CD34+ cell transplantation in patients with nonischemic dilated cardiomyopathy. *Circulation* 2013;**128**(11 Suppl 1):S42–S49.
  10. Lezaic L, Socan A, Poglajen G, Peitl PK, Sever M, Cukjati M, Cernelc P, Wu JC, Haddad F, Vrtovec B. Intracoronary transplantation of CD34(+) cells is associated with improved myocardial perfusion in patients with nonischemic dilated cardiomyopathy. *J Card Fail* 2015;**21**:145–152.
  11. Hamshere S, Arnous S, Choudhury T, Choudry F, Mozi A, Yeo C, Barrett CRN, Saunders N, Gulati A, Knight C, Locca D, Davies C, Cowie MR, Prasad S, Parmar M, Agrawal S, Jones D, Martin J, McKenna V, Mathur A. Randomized trial of combination cytokine and adult autologous bone marrow progenitor cell administration in patients with non-ischaemic dilated cardiomyopathy: the REGENERATE-DCM clinical trial. *Eur Heart J* 2015;**36**:3061–3069.
  12. Mathiasen AB, Qayyum AA, Jørgensen E, Helqvist S, Fischer-Nielsen A, Kofoed KF, Haack-Sørensen M, Ekblond A, Kastrup J. Bone-marrow derived mesenchymal stromal cell treatment in patients with severe ischemic heart failure: a randomized placebo-controlled trial (MSC-HF trial). *Eur Heart J* 2015;**36**:1744–1753.
  13. Fisher SA, Doree C, Mathir A, Martin-Rendon E. Meta-analysis of cell therapy trials for patients with heart failure. *Circ Res* 2015;**116**:1361–1377.
  14. Afzal MR, Samanta A, Shah ZI, Jeevanantham V, Abdel-Latif A, Zuba-Surma EK, Dawn B. Adult bone marrow cell therapy for ischemic heart disease: evidence and insights from randomized controlled trials. *Circ Res* 2015;in press.
  15. Gyöngyösi M, Wojakowski W, Lemarchand P, Lunde K, Tendera M, Bartunek J, Marban E, Assmus B, Henry TD, Traverse JH, Moyé LA, Sürder D, Corti R, Huikuri H, Miettinen J, Wöhrle J, Obradovic S, Roncalli J, Malliaras K, Pokushalov E, Romanov A, Kastrup J, Bergmann MW, Atsma DE, Diederichsen A, Edes I, Benedek I, Benedek T, Pejkov H, Nyolczas N, Pavo N, Bergler-Klein J, Pavo IJ, Sylven C, Berti S, Navarese EP, Maurer G; ACCRUE Investigators. Meta-Analysis of Cell-based Cardiac stUdiEs (ACCRUE) in patients with acute myocardial infarction based on individual patient data. *Circ Res* 2015;**116**:1346–1360.

## CARDIOVASCULAR FLASHLIGHT

doi:10.1093/eurheartj/ehv238

Online publish-ahead-of-print 3 June 2015

### Lipoma of the interventricular septum

Lorenzo Monti<sup>1\*</sup>, Claudia Scardino<sup>2</sup>, Barbara Nardi<sup>1</sup>, and Luca Balzarini<sup>1</sup>

<sup>1</sup>Radiology Department, Humanitas Research Hospital, I.R.C.C.S., Via Manzoni 56, Rozzano, MI 20089, Italy; and <sup>2</sup>School of Cardiology, University of Milan, Milan, Italy

\*Corresponding author. Tel: +39 0282246648, Fax: +390282246692, Email: [lorenzo.monti@humanitas.it](mailto:lorenzo.monti@humanitas.it)

A 49-year-old man without cardiovascular risk factors and a negative cardiovascular history was referred to our Hospital for further characterization of a solid, hyperechoic mass in the mid portion of the interventricular septum (Panel A), incidentally found on a check-up transthoracic echocardiogram. The cardiac magnetic resonance (CMR) study showed a well-defined ovoid mass, diameter 29 × 17 mm, located in the mid portion of the interventricular septum. The mass' signal was hyperintense on T1-weighted sequences (Panel B), with a complete signal suppression after a fat-saturation prepulse (Panel C). In fat-saturated oedema images ('T2 STIR'), the mass was hypointense, further confirming the solid, hypovascular nature of the content. No signs of fibrosis were evident at late gadolinium enhancement study (Panel D). These findings are diagnostic for an intramyocardial lipoma.

Cardiac lipomas are benign, encapsulated tumours, composed of mature fat cells, usually located in the interatrial septum: they account for 5% of primary cardiac tumours. Lipomas of the interventricular septum are extremely rare, with a prevalence of <1 of 1000 benign cardiac tumours. Their diagnosis is often incidental: the clinical symptoms of cardiac lipomas are non-specific, often absent and mainly related to their location and size. Surgical resection is recommended in symptomatic patients with intractable arrhythmias or flow obstruction within the heart. Treatment strategy is a dilemma when the patient is asymptomatic, and no guideline exists. This patient was managed with an implantable loop recorder in order to monitor over time the presence and frequency of ventricular arrhythmias.

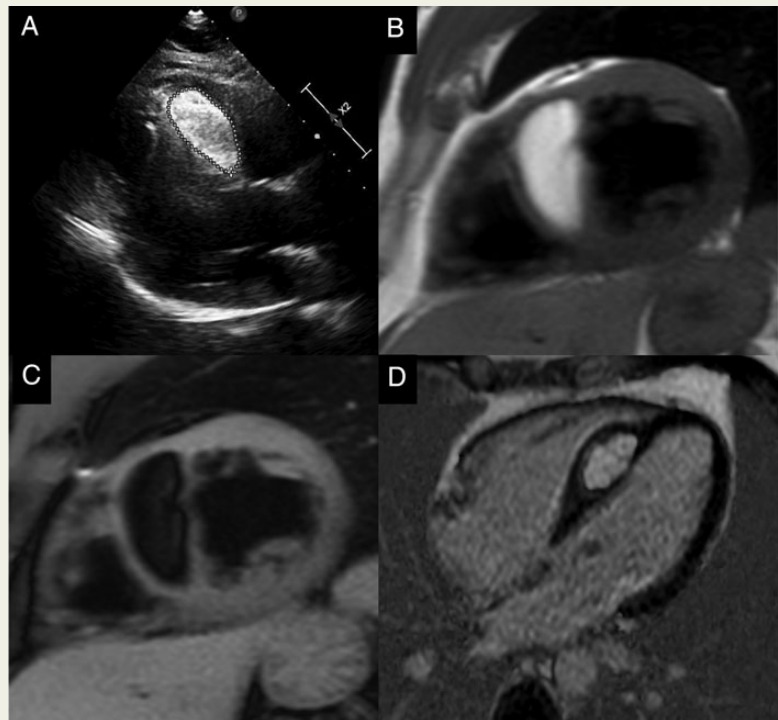

Source: https://academic.oup.com/eurheartj/article-pdf/36/44/3073/6732767/ehv238.pdf
